# Supplementary material for: A transcriptomic analysis of Neurospora crassa using five major crop residues and the novel role of the sporulation regulator rca-1 in lignocellulase production
Source: PubMed Central journal article supplement (PMC4330645; doi:10.1186/s13068-015-0208-0), 2015-02-12

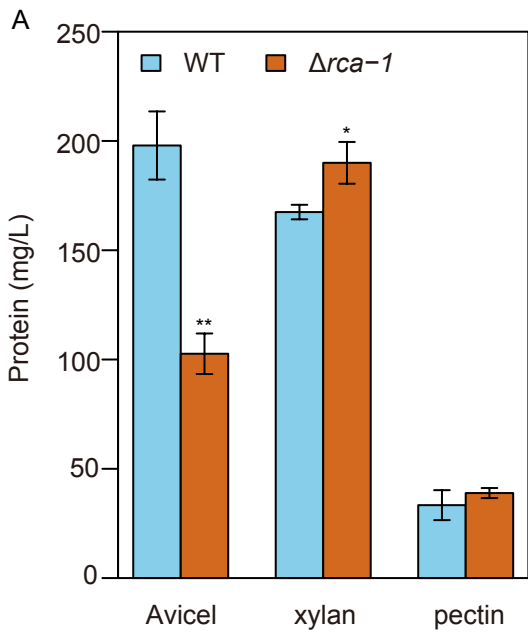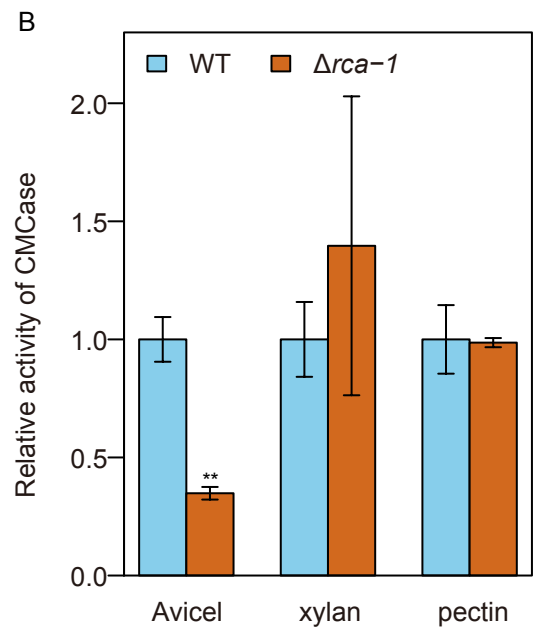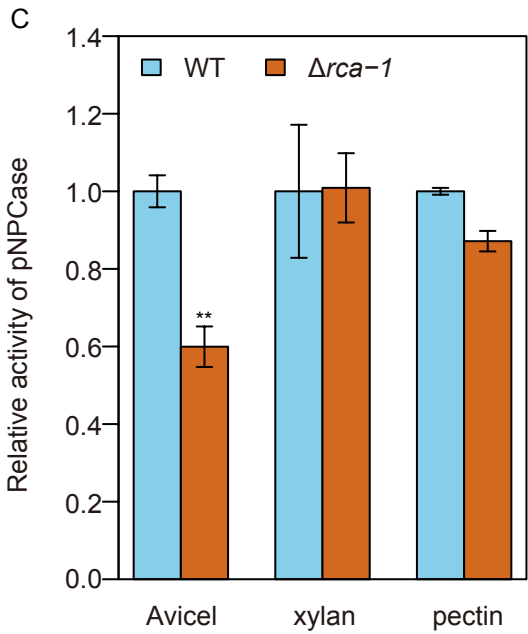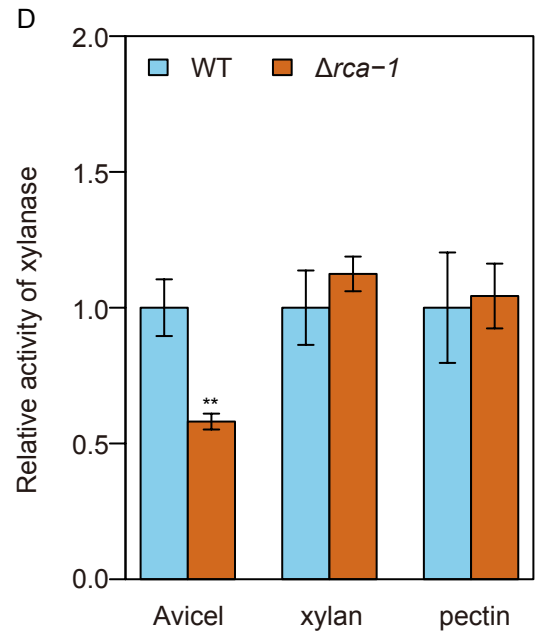

Supplement: 13068_2015_208_MOESM8_ESM.pdf [file 13068_2015_208_MOESM8_ESM.pdf]
